# Supplementary material for: The Fungal Metabolite Eurochevalierine, a Sequiterpene Alkaloid, Displays Anti-Cancer Properties through Selective Sirtuin 1/2 Inhibition
Source: MDPI journal article supplement (doi:10.3390/molecules23020333), 2018-02-05
Supplement: s1 [file s1]

Table S1: Global drug-likeness parameters calculated for reference sirtuin inhibitors and eurochevalierine.

| Method         | Parameter                       | Compound          |                    |                   |                    |                    |                    |
|----------------|---------------------------------|-------------------|--------------------|-------------------|--------------------|--------------------|--------------------|
|                |                                 | Eurochevalierine  | Suramin            | Nicotinamide      | Sirtinol           | EX-527             | AGK2               |
| Molinspiration | miLogP                          | 4.04              | -5.72              | -0.48             | 5.67               | 2.51               | 5.73               |
|                | TPSA                            |                   | 483.74             | 55.99             | 61.69              | 58.88              | 78.92              |
|                | natoms                          | 38                | 86                 | 9                 | 30                 | 17                 | 30                 |
|                | MW                              | 526.63            | 1297.3             | 122.13            | 394.47             | 248.71             | 434.28             |
|                | nON                             | 9                 | 29                 | 3                 | 4                  | 3                  | 5                  |
|                | nOHNH                           | 3                 | 12                 | 2                 | 2                  | 3                  | 1                  |
|                | nviolations                     | 1                 | 3                  | 0                 | 1                  | 0                  | 1                  |
|                | nrotb                           | 11                | 16                 | 1                 | 5                  | 1                  | 4                  |
|                | volume                          | 494.41            | 968.22             | 110.16            | 366.9              | 213.22             | 351                |
| Druglikeness   | CMC_like_Rule                   | Not qualified     | Not qualified      | Not qualified     | Qualified          | Qualified          | Qualified          |
|                |                                 | Molecular_weight, | Molecular_weight,  | Molecular_weight, |                    |                    |                    |
|                | CMC_like_Rule_Violation_Fields  | AMolRef,          | AMolRef,           | AMolRef,          |                    |                    |                    |
|                | CMC_like_Rule_Violations        | 3                 | 3                  | 3                 | 0                  | 0                  | 0                  |
|                |                                 |                   | Molecular_weight,  |                   | Molecular_weight,  |                    | Molecular_weight,  |
|                | Lead-like_Rule_Violation_Fields | Molecular_weight  | AlopP98_value      | AlopP98_value     | AlopP98_value      | AlopP98_value      | AlopP98_value      |
|                | Lead_like_Rule                  | Violated          | Violated           | Violated          | Violated           | Violated           | Violated           |
|                | Lead_like_Rule_Violations       | 1                 | 2                  | 1                 | 2                  | 1                  | 2                  |
|                | MDDR_like_Rule                  | Drug-like         | Mid-structure      | Nondrug-like      | Mid-structure      | Mid-structure      | Mid-structure      |
|                |                                 |                   |                    | No_Rings,         |                    |                    |                    |
|                | MDDR_like_Rule_Violation_Fields |                   | No_Rotatable_bonds | No_Rigid_bonds,   | No_Rotatable_bonds | No_Rotatable_bonds | No_Rotatable_bonds |
|                | MDDR_like_Rule_Violations       | 0                 | 1                  | 3                 | 1                  | 1                  | 1                  |
|                | Rule_of_Five                    | Suitable          | Violated           | Suitable          | Suitable           | Suitable           | Suitable           |
|                |                                 |                   | Molecular_weight,  |                   |                    |                    |                    |
|                |                                 |                   | No_H_bond_acceptor |                   |                    |                    |                    |
| ADME           | Rule_of_Five_Violation_Fields   | Molecular_weight  | s,                 |                   | AlopP98_value      |                    | AlopP98_value      |
|                | Rule_of_Five_Violations         | 1                 | 3                  | 0                 | 1                  | 0                  | 1                  |
|                | WDI_like_Rule                   | Out of 90% cutoff | Out of 90% cutoff  | Out of 90% cutoff | Out of 90% cutoff  | In 90% cutoff      | Out of 90% cutoff  |
|                |                                 | AMolRef,          | No_H_bond_acceptor |                   |                    |                    |                    |
|                |                                 | Kier_flexibility, | s,                 |                   |                    |                    |                    |
|                |                                 | Kier_alpha_01,    | No_H_bond_donors,  |                   |                    |                    |                    |
|                |                                 | Kier_alpha_02,    | AMolRef,           |                   |                    |                    |                    |
|                |                                 | VChi_00, VChi_01, | Kier_flexibility,  |                   |                    |                    |                    |
|                |                                 | VChi_02,          | Kier_alpha_01,     |                   |                    |                    |                    |
|                |                                 | Wiener_index,     | Kier_alpha_02,     |                   | AlopP98_value,     |                    |                    |
| Toxicity       | WDI_like_Rule_Violation_Fields  | 1st_Zagreb        | Kier_alpha_03,     | Balaban_index_JX  | AMolRef            |                    | AlopP98_value      |
|                | WDI_like_Rule_Violations        | 9                 | 15                 | 1                 | 2                  | 0                  | 1                  |
|                | BBB                             | 0.0988756         | 0.0355754*         | 0.337286          | 3.10148            | 4.10369            | 0.0836373          |
|                | Buffer_solubility_mg_L          | 0.00201616        | 80.8068**          | 2796.2            | 0.045153           | 321.867            | 59.6871**          |
|                | Caco2                           | 21.4869           | 0.831496           | 20.3605           | 28.4191            | 21.3007            | 26.6938            |
|                | CYP_2C19_inhibition             | Non               | Non                | Inhibitor         | Non                | Inhibitor          | Non                |
|                | CYP_2C9_inhibition              | Non               | Inhibitor          | Inhibitor         | Inhibitor          | Inhibitor          | Non                |
|                | CYP_2D6_inhibition              | Non               | Non                | Inhibitor         | Non                | Non                | Non                |
|                | CYP_2D6_substrate               | Non               | Non                | Non               | Non                | Non                | Non                |
|                | CYP_3A4_inhibition              | Inhibitor         | Inhibitor          | Inhibitor         | Non                | Inhibitor          | Non                |
|                | CYP_3A4_substrate               | Substrate         | Substrate          | Non               | Weakly             | Non                | Weakly             |
|                | HIA                             | 92.606444         | 65.212934          | 92.948174         | 95.772797          | 90.330406          | 97.265034          |
|                | MDCK                            | 0.0447817         | 0.0180481*         | 5.70167           | 0.0726271          | 50.9482            | 0.0919261          |
|                | Pgp_inhibition                  | Non               | Inhibitor          | Non               | Inhibitor          | Non                | Inhibitor          |
|                | Plasma_Protein_Binding          | 84.822896         | 100                | 2.029501          | 91.126218          | 90.949028          | 97.529775          |
|                | Pure_water_solubility_mg_L      | 0.222789          | 2.71E-07           | 78993             | 0.0581602          | 22.5921            | 0.0152093          |
|                | Skin_Permability                | -3.09425          | -0.790679*         | -3.71578          | -2.02133           | -4.31139           | -2.46653           |
|                | SKlogD_value                    | 3.22105           | -3.74189           | -0.25836          | 5.23865            | 2.79476            | 5.50681            |
|                | SKlogP_value                    | 3.22105           | 2.43673            | -0.25836          | 5.23865            | 2.79476            | 5.50681            |
|                | SKlogS_buffer                   | -8.41698          | -4.205580**        | -1.64024          | -6.94133           | -2.88802           | -3.861890**        |
|                | SKlogS_pure                     | -6.37361          | -12.67952          | -0.18922          | -6.83139           | -4.04174           | -7.45566           |
| Toxicity       | algae_at                        | 0.00715077        | 3.10E-06           | 0.435369          | 0.00764099         | 0.03319            | 0.00448356         |
|                | Ames_test                       | mutagen           | non-mutagen        | mutagen           | mutagen            | mutagen            | mutagen            |
|                | Carcino_Mouse                   | positive          | positive           | positive          | positive           | positive           | negative           |
|                | Carcino_Rat                     | negative          | negative           | negative          | negative           | negative           | positive           |
|                | daphnia_at                      | 0.0469835         | 9.53E-05           | 3.47006           | 0.0067202          | 0.0607803          | 0.00251836         |
|                | hERG_inhibition                 | ambiguous         | ambiguous          | medium_risk       | ambiguous          | medium_risk        | medium_risk        |
|                | medaka_at                       | 0.00526705        | 2.67E-07           | 12.0931           | 0.000123046        | 0.00654108         | 2.17E-05           |
|                | minnow_at                       | 0.00417433        | 3.45E-07           | 3.01776           | 0.000452177        | 0.00929953         | 8.68E-05           |
|                | TA100_10RLI                     | negative          | negative           | positive          | negative           | positive           | negative           |
|                | TA100_NA                        | negative          | negative           | positive          | negative           | negative           | positive           |
|                | TA1535_10RLI                    | negative          | negative           | positive          | negative           | negative           | negative           |
|                | TA1535_NA                       | negative          | negative           | positive          | negative           | positive           | negative           |
