# Supplementary material for: The Fungal Metabolite Eurochevalierine, a Sequiterpene Alkaloid, Displays Anti-Cancer Properties through Selective Sirtuin 1/2 Inhibition
Source: MDPI journal article supplement (doi:10.3390/molecules23020333), 2018-02-05
Supplement: s1 [file s1]

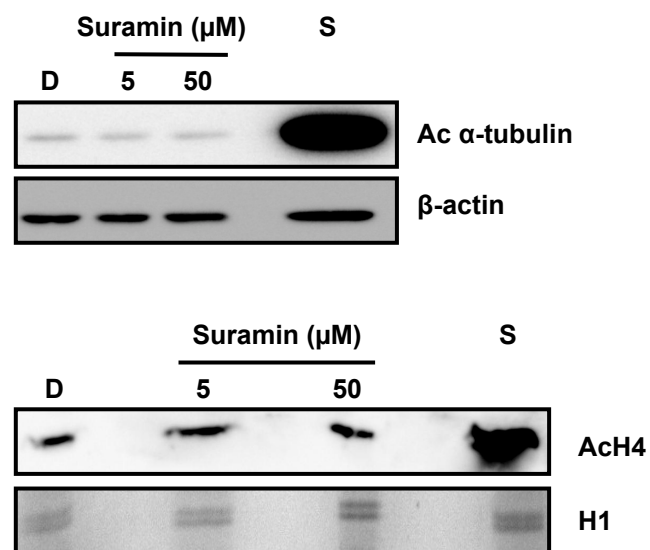

**Figure S2.** Suramin fails to induce histone H4 or  $\alpha$ -tubulin acetylation in K-562 cells. K-562 cells were treated with DMSO (D), 5 or 50  $\mu$ M eurochevalierine and SAHA (S; 1  $\mu$ M). Acetylation of histone H4 (AcH4) and  $\alpha$ -tubulin (Ac  $\alpha$ -tubulin) was analyzed by Western Blot.  $\beta$ -actin and histone H1 were used as loading controls for the analysis of total and acid extracts, respectively. Blots are representative of three independent experiments.
