# Supplementary figures and images for: The Fungal Metabolite Eurochevalierine, a Sequiterpene Alkaloid, Displays Anti-Cancer Properties through Selective Sirtuin 1/2 Inhibition
Source: MDPI journal article supplement (doi:10.3390/molecules23020333), 2018-02-05

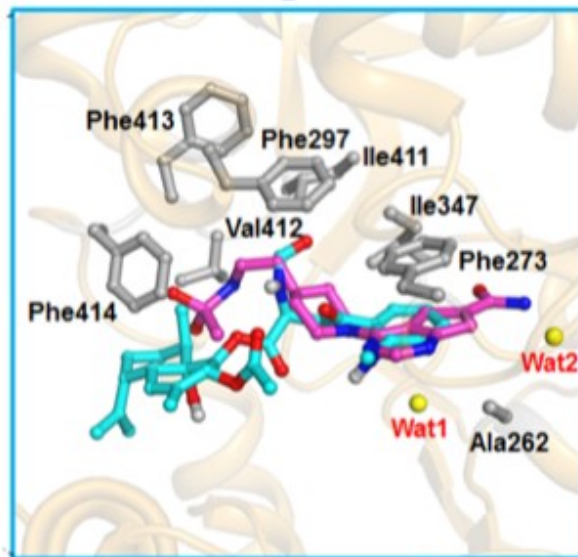

**SIRT1**

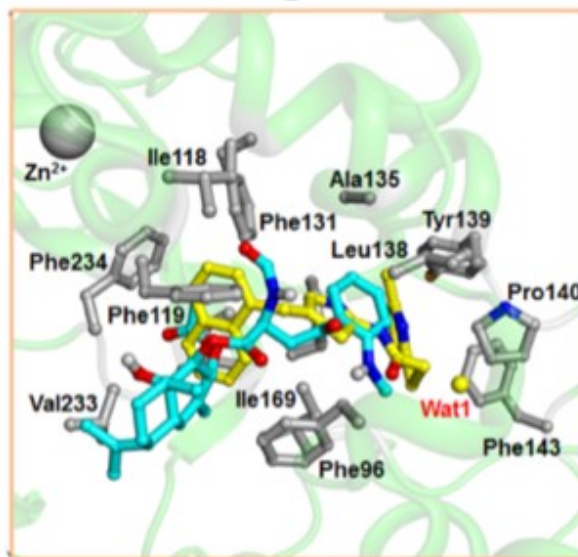

**SIRT2**

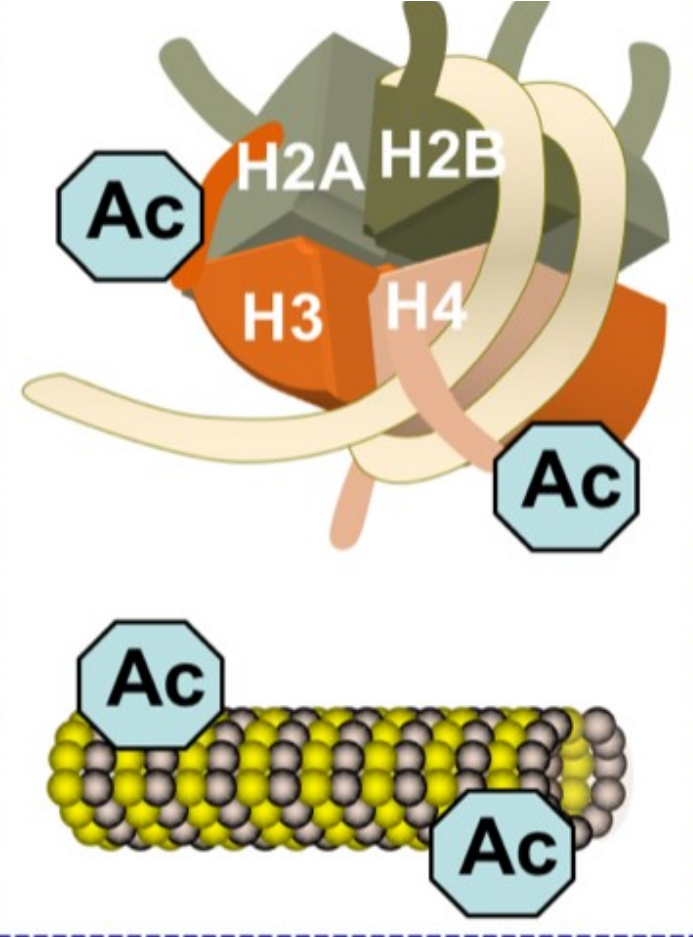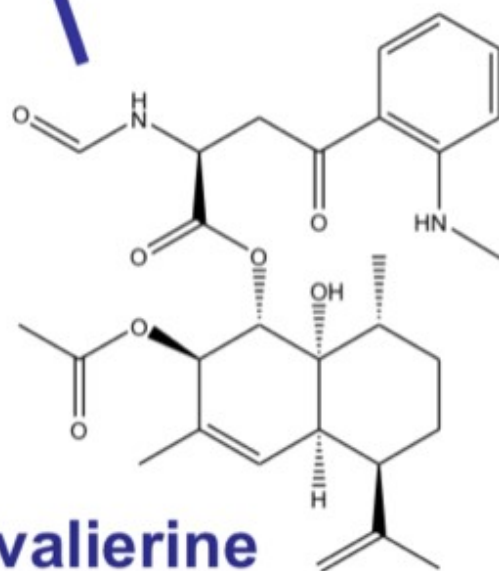

**Eurochevalierine**  
(from *Neosartorya pseudofischeri*)

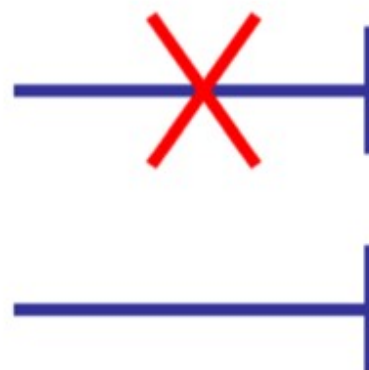

**Healthy cells**

**Cancer cells**

Supplement: s1 [file s1]
